# Supplementary material for: Influence of polymer conformations on the aggregation behaviour of alternating dialkylsilylene-[4,4′-divinyl(cyanostilbene)] copolymers
Source: Royal Society of Chemistry journal article supplement (doi:10.1039/c1py00259g), 2011-01-01
Supplement: c1py00259g.pdf [file c1py00259g.pdf]

## Influence of Polymer Conformations on the Aggregation Behaviour of

### Alternating Dialkylsilylene-[4,4'-divinyl(cyanostilbene)] Copolymers

Chih-Hsien Chen, <sup>\*a</sup> Shern-Long Lee, <sup>a</sup> Tsong-Shin Lim, <sup>b</sup> Chun-hsien Chen, <sup>a</sup> Tien-Yau

Luh<sup>\*a</sup>

<sup>a</sup>Department of Chemistry, National Taiwan University, Taipei, Taiwan 106

<sup>b</sup>Department of Physics, Tunghai University, Taichung, Taiwan 407

\*Corresponding authors: E-mail: [tyluh@ntu.edu.tw](mailto:tyluh@ntu.edu.tw), [chhschen@ntu.edu.tw](mailto:chhschen@ntu.edu.tw)

## Supplementary Information

### Table of Contents

#### 1. X-ray diffraction measurement

**Fig. S1** XRD patterns of **3a** (black), **3b** (red), and blank test (blue).

**Table 1** Crystal size estimation of **3a** and **3b**.

#### 2. **Fig. S2** Normal (black) and first derivative (red) of DSC curves of (a) **3a** and (b) **3b**.

#### 3. Crystal data and structure refinement for **5**.

**Table S2** Crystal data and structure refinement for **5**.

**Table S3** Atomic coordinates ( $\times 10^4$ ) and equivalent isotropic displacement parameters ( $\text{\AA}^2 \times 10^3$ ) for **5**.  $U(\text{eq})$  is defined as one third of the trace of the orthogonalized  $U^{ij}$  tensor.

**Table S4.** Bond lengths [ $\text{\AA}$ ] and angles [ $^\circ$ ] for **5**.

**Table S5.** Anisotropic displacement parameters ( $\text{\AA}^2 \times 10^3$ ) for **5**. The anisotropic displacement factor exponent takes the form:  $-2\pi^2 [h^2 a^{*2} U^{11} + \dots + 2 h k a^* b^* U^{12}]$

#### 4. $^1\text{H}$ spectra of new compounds

**Fig. S3**  $^1\text{H}$  NMR spectrum of **8**.

**Fig. S4**  $^{13}\text{C}$  NMR spectrum of **8**.

**Fig. S5**  $^1\text{H}$  NMR spectrum of **9**.

**Fig. S6**  $^{13}\text{C}$  NMR spectrum of **9**.

**Fig. S7**  $^1\text{H}$  NMR spectrum of **5**.

**Fig. S8**  $^{13}\text{C}$  NMR spectrum of **5**.

**Fig. S9**  $^1\text{H}$  NMR spectrum of **12**.

**Fig. S10**  $^{13}\text{C}$  NMR spectrum of **12**.

**Fig. S11**  $^1\text{H}$  NMR spectrum of **3a**.

**Fig. S12**  $^1\text{H}$  NMR spectrum of **3b**.

**Fig. S13**  $^1\text{H}$  NMR spectrum of **4**.

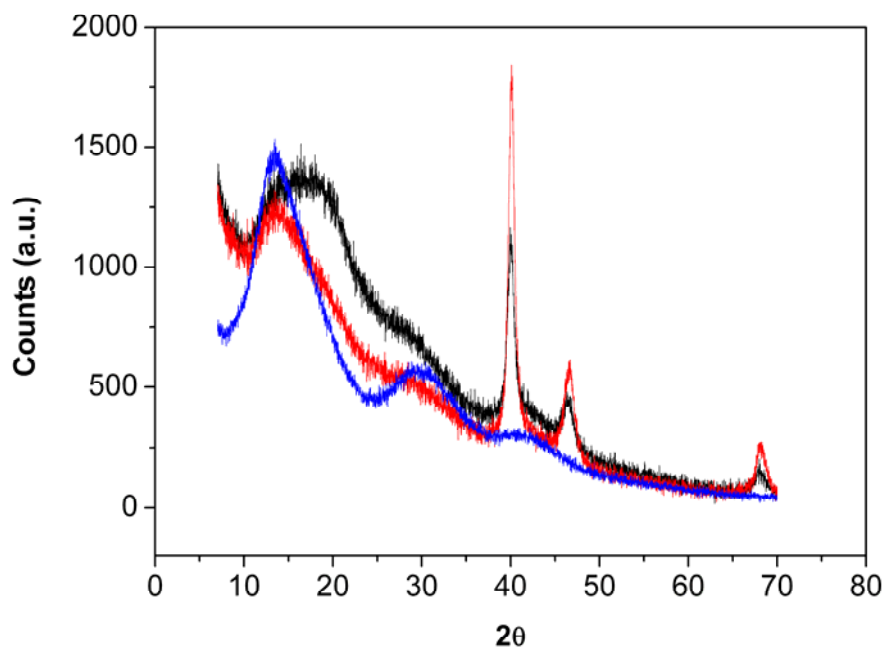

**Fig. S1** XRD patterns of **3a** (black), **3b** (red), and blank test (blue).

#### **Crystal size estimation of 3a and 3b.**

The crystal sizes ( $t$ ) of **3a** and **3b** were estimated by Scherrer's formula,  $t = 0.9\lambda/B\cos\theta$ , where  $\lambda$ ,  $B$  and  $\theta$  denote the wavelength of X-ray (1.54056 Å), the half width of peaks in radian, and the angle of incident beam, respectively. The results are summarized in Table S1.

**Table S1** Crystal size estimation of **3a** and **3b**.

|           | B (radian) | cos $\theta$ | $t$ (nm) |
|-----------|------------|--------------|----------|
| <b>3a</b> | 0.0149     | 0.94         | 9.9      |
| <b>3b</b> | 0.0128     | 0.93         | 11.5     |

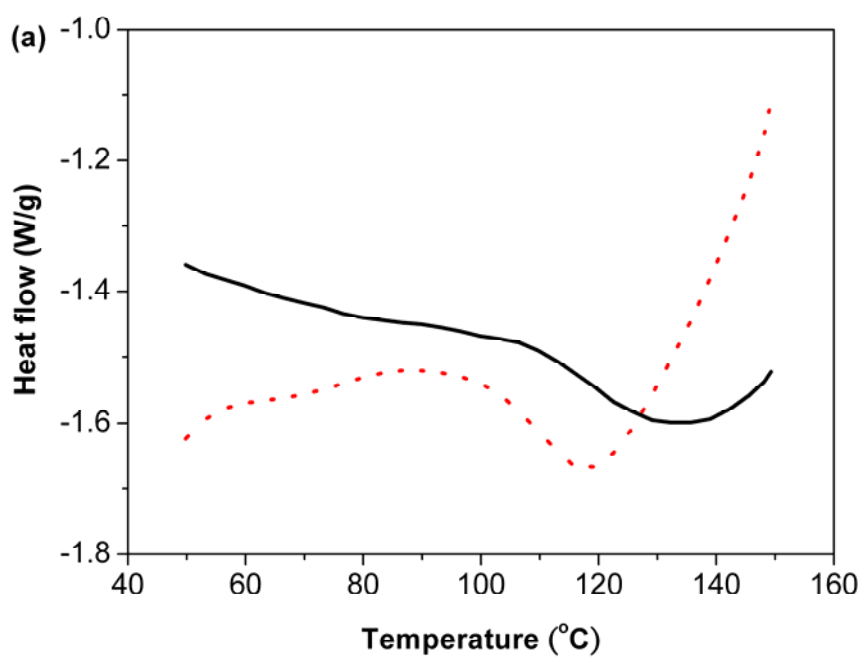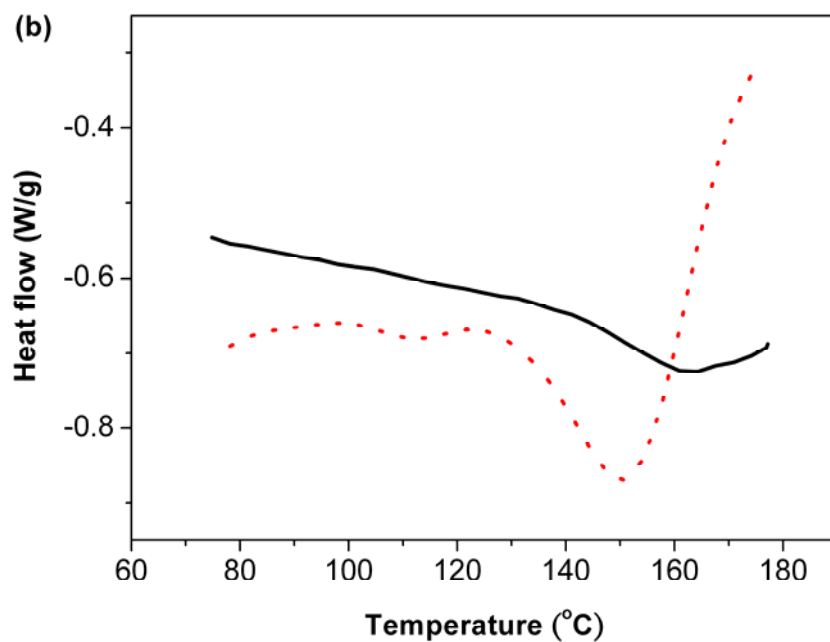

**Fig. S2** Normal (black) and first derivative (red) of DSC curves of (a) **3a** and (b) **3b**.

**Table S2** Crystal data and structure refinement for **5**.

|                                   |                                                   |                  |
|-----------------------------------|---------------------------------------------------|------------------|
| Identification code               | ic14121                                           |                  |
| Empirical formula                 | C <sub>25</sub> H <sub>31</sub> N Si <sub>2</sub> |                  |
| Formula weight                    | 401.69                                            |                  |
| Temperature                       | 295(2) K                                          |                  |
| Wavelength                        | 1.54178 Å                                         |                  |
| Crystal system                    | Monoclinic                                        |                  |
| Space group                       | P2(1)/c                                           |                  |
| Unit cell dimensions              | a = 18.3400(6) Å                                  | α = 90°.         |
|                                   | b = 6.7435(2) Å                                   | β = 102.043(4)°. |
|                                   | c = 20.8688(7) Å                                  | γ = 90°.         |
| Volume                            | 2524.16(14) Å <sup>3</sup>                        |                  |
| Z                                 | 4                                                 |                  |
| Density (calculated)              | 1.057 Mg/m <sup>3</sup>                           |                  |
| Absorption coefficient            | 1.328 mm <sup>-1</sup>                            |                  |
| F(000)                            | 864                                               |                  |
| Crystal size                      | 0.25 x 0.20 x 0.15 mm <sup>3</sup>                |                  |
| Theta range for data collection   | 4.33 to 68.00°.                                   |                  |
| Index ranges                      | -19<=h<=22, -6<=k<=8, -23<=l<=25                  |                  |
| Reflections collected             | 9307                                              |                  |
| Independent reflections           | 4565 [R(int) = 0.0266]                            |                  |
| Completeness to theta = 68.00°    | 99.5 %                                            |                  |
| Absorption correction             | Semi-empirical from equivalents                   |                  |
| Max. and min. transmission        | 1.00000 and 0.45060                               |                  |
| Refinement method                 | Full-matrix least-squares on F <sup>2</sup>       |                  |
| Data / restraints / parameters    | 4565 / 0 / 253                                    |                  |
| Goodness-of-fit on F <sup>2</sup> | 2.275                                             |                  |
| Final R indices [I>2σ(I)]         | R1 = 0.1148, wR2 = 0.3246                         |                  |
| R indices (all data)              | R1 = 0.1375, wR2 = 0.3404                         |                  |
| Largest diff. peak and hole       | 1.253 and -0.625 e.Å <sup>-3</sup>                |                  |

**Table S3** Atomic coordinates ( $\times 10^4$ ) and equivalent isotropic displacement parameters ( $\text{\AA}^2 \times 10^3$ ) for **5**.  $U(\text{eq})$  is defined as one third of the trace of the orthogonalized  $U_{ij}$  tensor.

|       | x       | y        | z        | U(eq)  |
|-------|---------|----------|----------|--------|
| Si(1) | 1428(1) | 3328(3)  | 985(1)   | 78(1)  |
| Si(2) | 8544(1) | 2472(3)  | -3488(1) | 78(1)  |
| N(1)  | 5222(4) | 9566(7)  | -1109(3) | 119(2) |
| C(1)  | 5147(3) | 7946(8)  | -1201(3) | 85(2)  |
| C(2)  | 5079(5) | 5870(10) | -1324(5) | 179(6) |
| C(3)  | 4885(5) | 4571(11) | -1261(4) | 155(4) |
| C(4)  | 4271(3) | 5046(14) | -736(3)  | 104(2) |
| C(5)  | 4093(3) | 6659(12) | -408(3)  | 103(2) |
| C(6)  | 3575(3) | 6528(9)  | -7(3)    | 85(2)  |
| C(7)  | 3213(2) | 4791(8)  | 67(2)    | 67(1)  |
| C(8)  | 3414(3) | 3120(10) | -258(3)  | 91(2)  |
| C(9)  | 3930(3) | 3250(13) | -639(3)  | 105(2) |
| C(10) | 2639(2) | 4741(8)  | 466(2)   | 69(1)  |
| C(11) | 2208(3) | 3236(8)  | 553(2)   | 78(1)  |
| C(12) | 1258(4) | 5935(11) | 1208(3)  | 108(2) |
| C(13) | 590(3)  | 2389(13) | 424(3)   | 116(3) |
| C(14) | 1634(4) | 1780(13) | 1733(3)  | 121(2) |
| C(15) | 5702(3) | 5114(11) | -1852(3) | 89(2)  |
| C(16) | 5947(3) | 6639(10) | -2192(3) | 87(2)  |
| C(17) | 6448(3) | 6289(8)  | -2582(3) | 80(1)  |
| C(18) | 6751(2) | 4446(8)  | -2652(2) | 69(1)  |
| C(19) | 6495(3) | 2908(9)  | -2313(3) | 84(1)  |
| C(20) | 5977(3) | 3244(11) | -1934(3) | 97(2)  |
| C(21) | 7323(2) | 4214(8)  | -3043(2) | 77(1)  |
| C(22) | 7765(3) | 2703(9)  | -3053(2) | 81(1)  |
| C(23) | 8369(4) | 3877(10) | -4259(3) | 102(2) |
| C(24) | 9409(3) | 3354(15) | -2945(4) | 133(3) |
| C(25) | 8645(4) | -244(11) | -3658(3) | 117(2) |

**Table S4** Bond lengths [Å] and angles [°] for **5**.

---

|                   |           |
|-------------------|-----------|
| Si(1)-C(13)       | 1.840(6)  |
| Si(1)-C(11)       | 1.845(5)  |
| Si(1)-C(14)       | 1.850(7)  |
| Si(1)-C(12)       | 1.862(7)  |
| Si(2)-C(23)       | 1.837(6)  |
| Si(2)-C(24)       | 1.845(7)  |
| Si(2)-C(22)       | 1.852(5)  |
| Si(2)-C(25)       | 1.882(7)  |
| N(1)-C(1)         | 1.113(7)  |
| C(1)-C(2)         | 1.424(8)  |
| C(2)-C(3)         | 0.965(11) |
| C(2)-C(15)        | 1.818(13) |
| C(3)-C(4)         | 1.757(12) |
| C(4)-C(5)         | 1.361(11) |
| C(4)-C(9)         | 1.398(11) |
| C(5)-C(6)         | 1.393(7)  |
| C(6)-C(7)         | 1.371(7)  |
| C(7)-C(8)         | 1.404(8)  |
| C(7)-C(10)        | 1.472(5)  |
| C(8)-C(9)         | 1.358(7)  |
| C(10)-C(11)       | 1.322(7)  |
| C(15)-C(16)       | 1.377(9)  |
| C(15)-C(20)       | 1.382(9)  |
| C(16)-C(17)       | 1.369(7)  |
| C(17)-C(18)       | 1.381(7)  |
| C(18)-C(19)       | 1.392(7)  |
| C(18)-C(21)       | 1.465(6)  |
| C(19)-C(20)       | 1.375(7)  |
| C(21)-C(22)       | 1.306(7)  |
| C(13)-Si(1)-C(11) | 107.9(3)  |
| C(13)-Si(1)-C(14) | 109.9(4)  |
| C(11)-Si(1)-C(14) | 110.5(3)  |
| C(13)-Si(1)-C(12) | 108.9(4)  |
| C(11)-Si(1)-C(12) | 109.9(3)  |
| C(14)-Si(1)-C(12) | 109.7(4)  |
| C(23)-Si(2)-C(24) | 110.1(4)  |

|                   |           |
|-------------------|-----------|
| C(23)-Si(2)-C(22) | 112.0(3)  |
| C(24)-Si(2)-C(22) | 108.9(3)  |
| C(23)-Si(2)-C(25) | 110.0(3)  |
| C(24)-Si(2)-C(25) | 108.9(4)  |
| C(22)-Si(2)-C(25) | 106.9(3)  |
| N(1)-C(1)-C(2)    | 177.8(8)  |
| C(3)-C(2)-C(1)    | 152.8(16) |
| C(3)-C(2)-C(15)   | 97.1(11)  |
| C(1)-C(2)-C(15)   | 110.1(8)  |
| C(2)-C(3)-C(4)    | 102.8(11) |
| C(5)-C(4)-C(9)    | 117.2(5)  |
| C(5)-C(4)-C(3)    | 135.4(7)  |
| C(9)-C(4)-C(3)    | 107.3(6)  |
| C(4)-C(5)-C(6)    | 121.1(6)  |
| C(7)-C(6)-C(5)    | 121.9(6)  |
| C(6)-C(7)-C(8)    | 116.7(4)  |
| C(6)-C(7)-C(10)   | 120.2(5)  |
| C(8)-C(7)-C(10)   | 123.0(5)  |
| C(9)-C(8)-C(7)    | 121.0(6)  |
| C(8)-C(9)-C(4)    | 121.9(7)  |
| C(11)-C(10)-C(7)  | 127.9(5)  |
| C(10)-C(11)-Si(1) | 126.1(4)  |
| C(16)-C(15)-C(20) | 116.7(4)  |
| C(16)-C(15)-C(2)  | 114.7(5)  |
| C(20)-C(15)-C(2)  | 128.6(5)  |
| C(17)-C(16)-C(15) | 120.6(6)  |
| C(16)-C(17)-C(18) | 123.5(5)  |
| C(17)-C(18)-C(19) | 115.5(4)  |
| C(17)-C(18)-C(21) | 120.4(4)  |
| C(19)-C(18)-C(21) | 124.1(5)  |
| C(20)-C(19)-C(18) | 121.1(5)  |
| C(19)-C(20)-C(15) | 122.4(5)  |
| C(22)-C(21)-C(18) | 127.7(5)  |
| C(21)-C(22)-Si(2) | 128.2(4)  |

---

Symmetry transformations used to generate equivalent atoms:



**Table S5** Anisotropic displacement parameters ( $\text{\AA}^2 \times 10^3$ ) for **5**. The anisotropic displacement factor exponent takes the form:  $-2\pi^2 [h^2 a^{*2} U^{11} + \dots + 2 h k a^* b^* U^{12}]$

|       | $U^{11}$ | $U^{22}$ | $U^{33}$ | $U^{23}$ | $U^{13}$ | $U^{12}$ |
|-------|----------|----------|----------|----------|----------|----------|
| Si(1) | 69(1)    | 104(1)   | 66(1)    | -6(1)    | 28(1)    | -16(1)   |
| Si(2) | 66(1)    | 107(1)   | 68(1)    | -8(1)    | 26(1)    | 12(1)    |
| N(1)  | 192(5)   | 46(2)    | 150(5)   | -2(3)    | 104(4)   | -6(3)    |
| C(1)  | 102(4)   | 54(3)    | 109(4)   | 10(3)    | 43(3)    | 5(2)     |
| C(2)  | 197(9)   | 38(3)    | 224(10)  | 17(4)    | -131(8)  | -11(4)   |
| C(3)  | 193(8)   | 46(3)    | 173(8)   | -10(4)   | -83(7)   | 4(4)     |
| C(4)  | 57(3)    | 181(7)   | 76(3)    | 24(4)    | 22(2)    | 16(3)    |
| C(5)  | 72(3)    | 130(6)   | 111(4)   | 44(4)    | 28(3)    | -9(3)    |
| C(6)  | 70(3)    | 93(4)    | 100(3)   | 8(3)     | 35(3)    | 1(2)     |
| C(7)  | 55(2)    | 84(3)    | 66(2)    | 0(2)     | 22(2)    | -1(2)    |
| C(8)  | 71(3)    | 113(4)   | 98(4)    | -21(3)   | 39(3)    | -7(3)    |
| C(9)  | 78(3)    | 149(6)   | 99(4)    | -26(4)   | 42(3)    | 11(4)    |
| C(10) | 67(2)    | 77(3)    | 70(2)    | -8(2)    | 28(2)    | -7(2)    |
| C(11) | 79(3)    | 86(3)    | 76(3)    | -8(2)    | 32(2)    | -16(2)   |
| C(12) | 118(5)   | 114(5)   | 103(4)   | -17(4)   | 47(4)    | 2(4)     |
| C(13) | 83(4)    | 163(7)   | 108(5)   | -30(5)   | 33(3)    | -34(4)   |
| C(14) | 117(5)   | 140(7)   | 111(5)   | 24(5)    | 33(4)    | -29(4)   |
| C(15) | 59(3)    | 132(5)   | 76(3)    | -4(3)    | 16(2)    | 24(3)    |
| C(16) | 78(3)    | 102(4)   | 85(3)    | -2(3)    | 25(3)    | 22(3)    |
| C(17) | 68(3)    | 82(3)    | 96(3)    | 4(3)     | 30(2)    | 10(2)    |
| C(18) | 57(2)    | 80(3)    | 75(2)    | 1(2)     | 23(2)    | -4(2)    |
| C(19) | 78(3)    | 76(3)    | 111(4)   | 2(3)     | 47(3)    | 1(2)     |
| C(20) | 74(3)    | 120(5)   | 106(4)   | 24(4)    | 44(3)    | -14(3)   |
| C(21) | 69(3)    | 84(3)    | 84(3)    | 6(3)     | 32(2)    | 4(2)     |
| C(22) | 78(3)    | 91(4)    | 82(3)    | 5(3)     | 34(2)    | 7(3)     |
| C(23) | 108(4)   | 102(4)   | 103(4)   | 14(4)    | 36(3)    | 7(3)     |
| C(24) | 76(4)    | 208(10)  | 118(5)   | -40(6)   | 27(3)    | -8(4)    |
| C(25) | 142(5)   | 110(5)   | 104(4)   | -1(4)    | 39(4)    | 34(4)    |

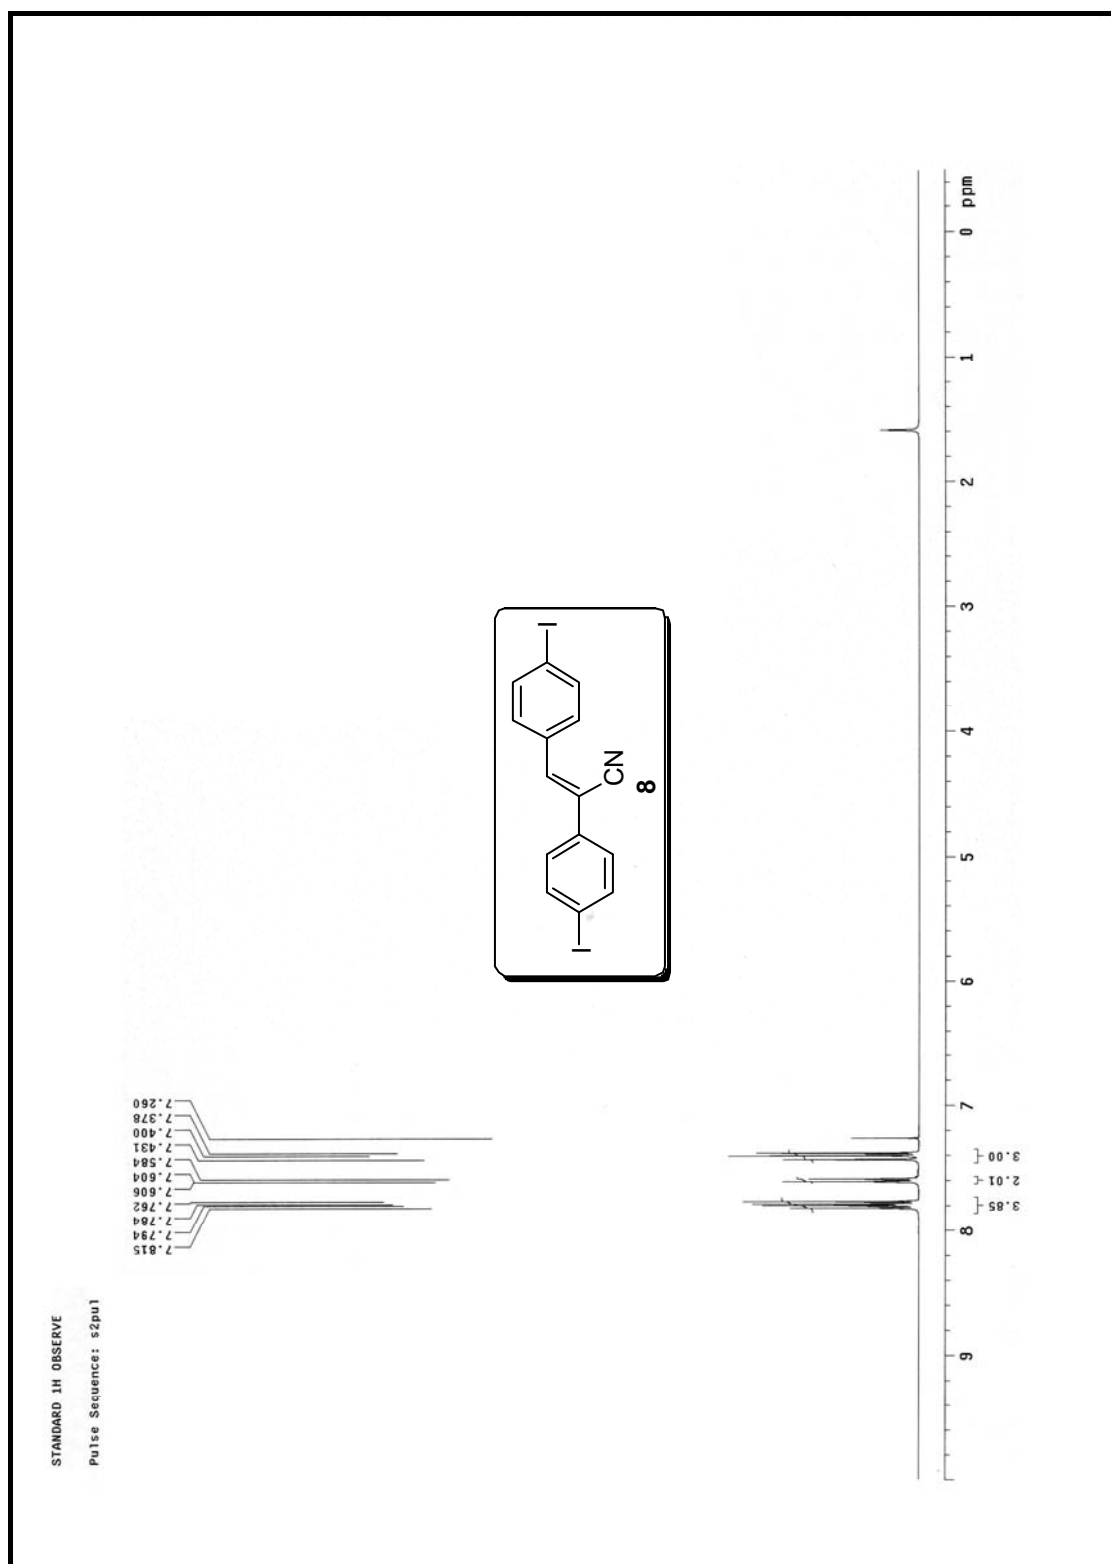

Fig. S3 <sup>1</sup>H NMR spectrum of **8**

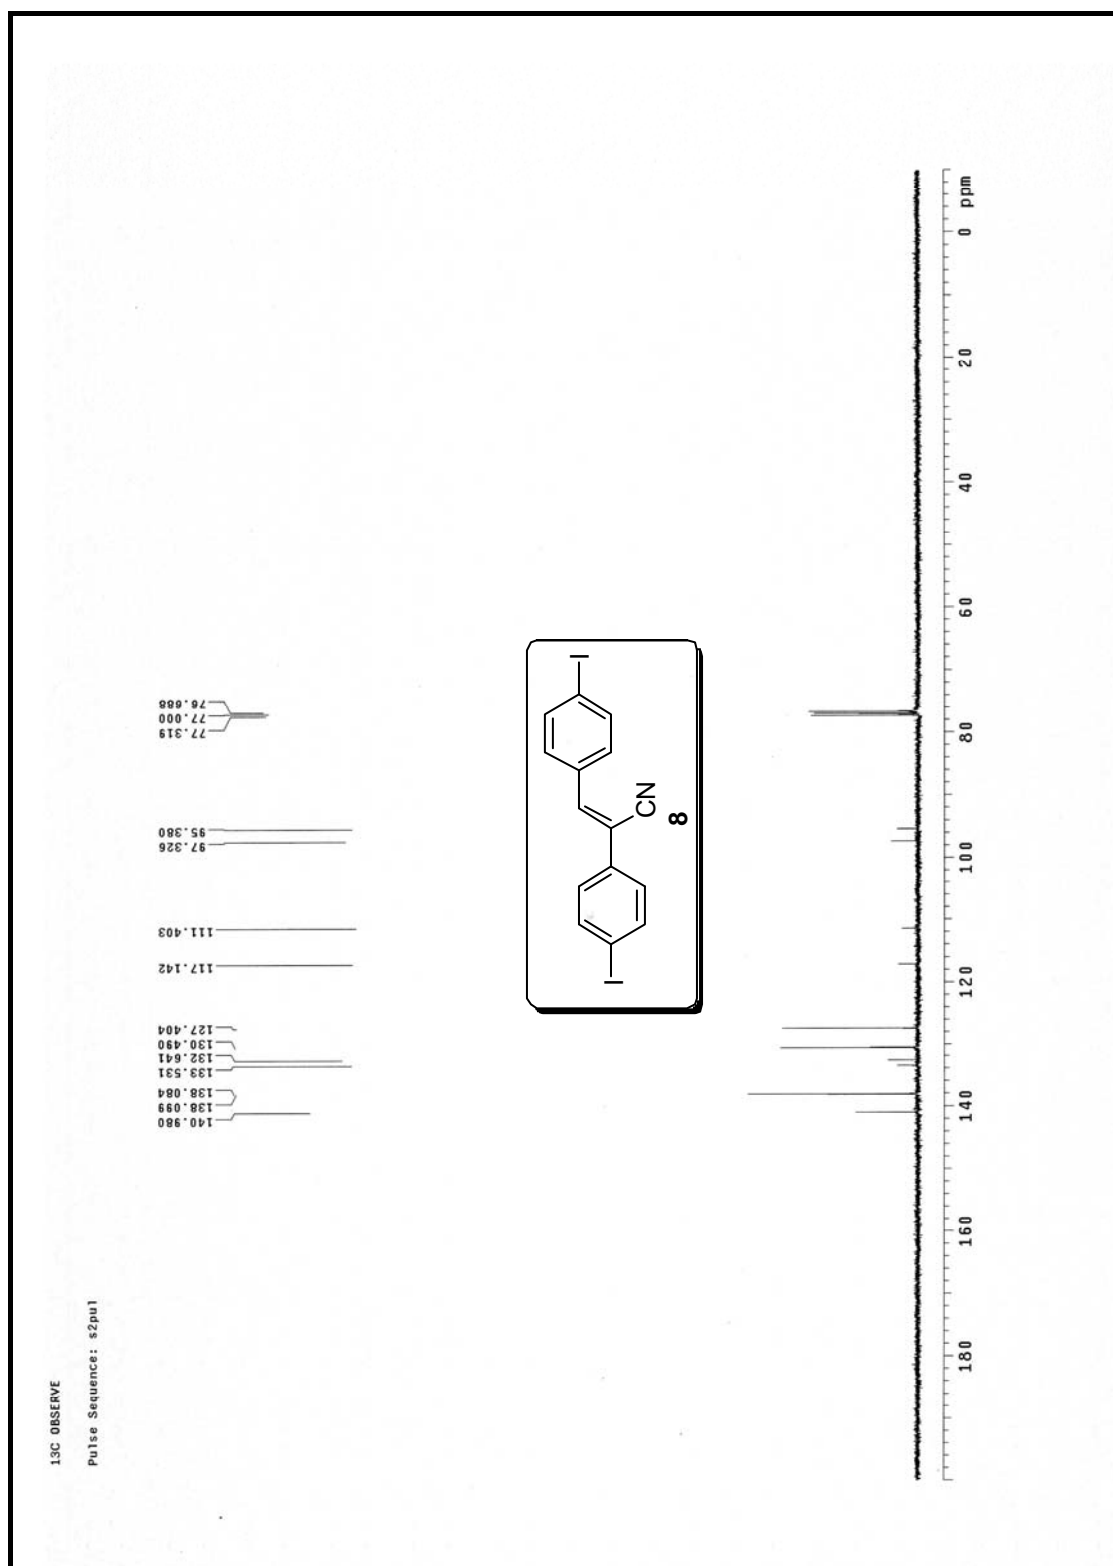

Fig. S4 <sup>13</sup>C NMR spectrum of **8**

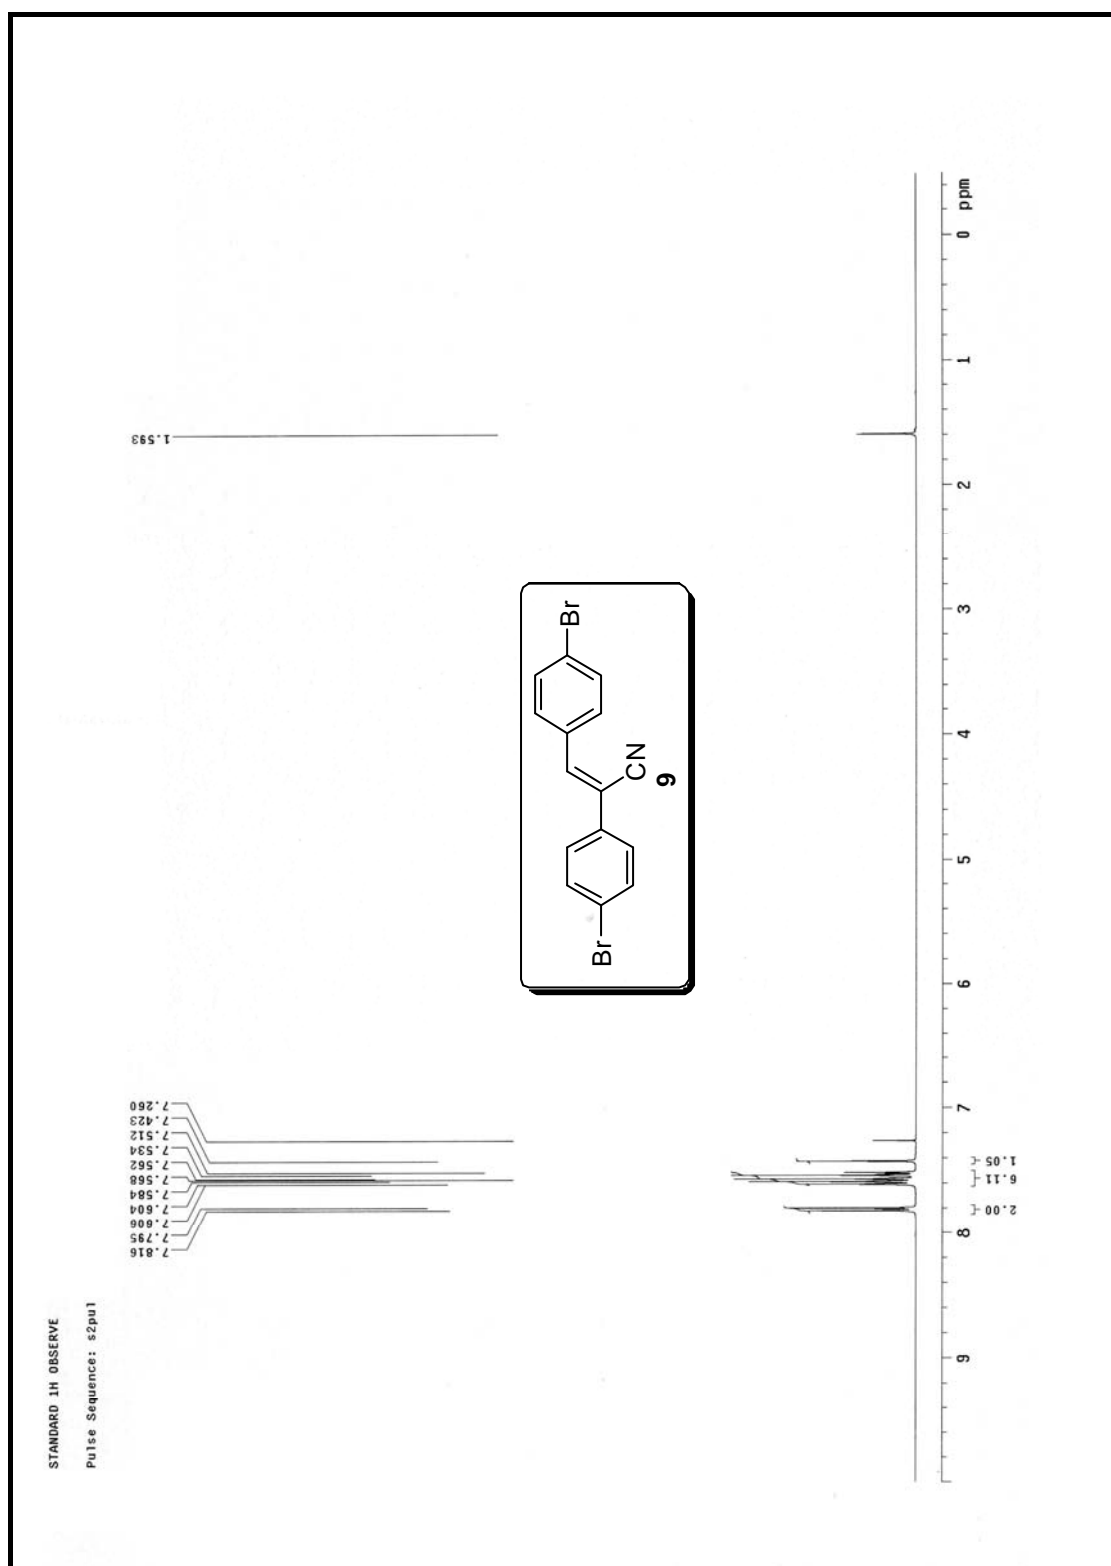

Fig. S5  $^1\text{H}$  NMR spectrum of **9**

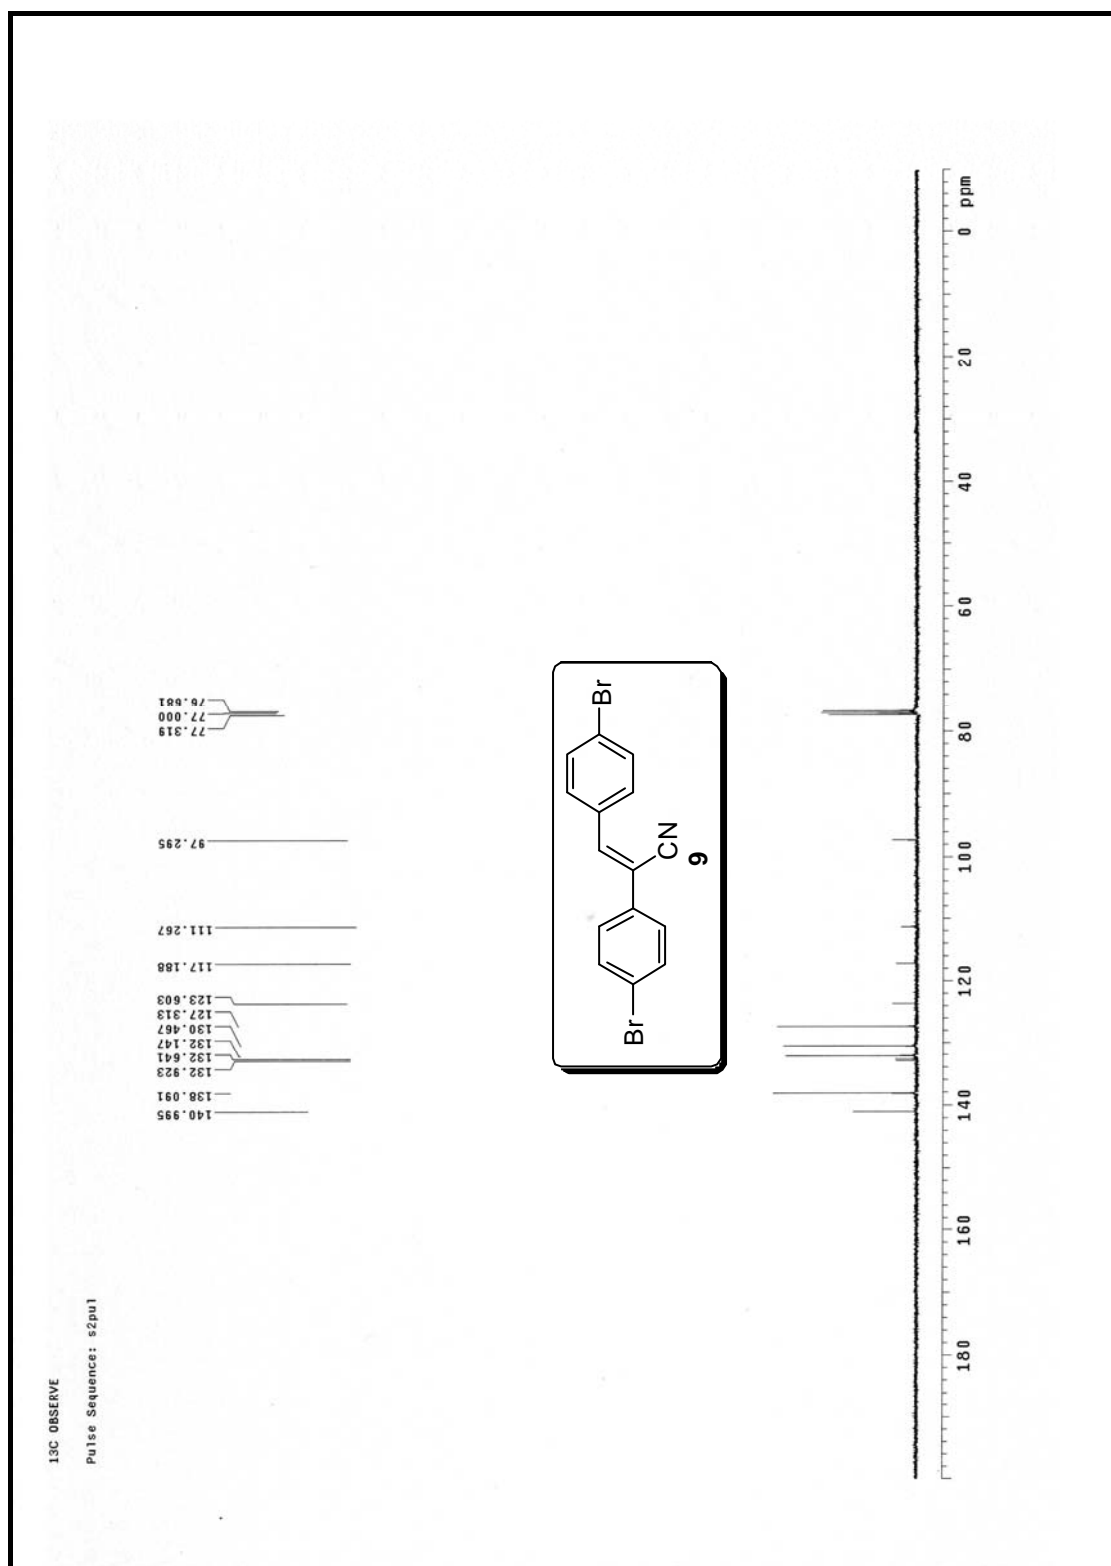

Fig. S6  $^{13}\text{C}$  NMR spectrum of **9**

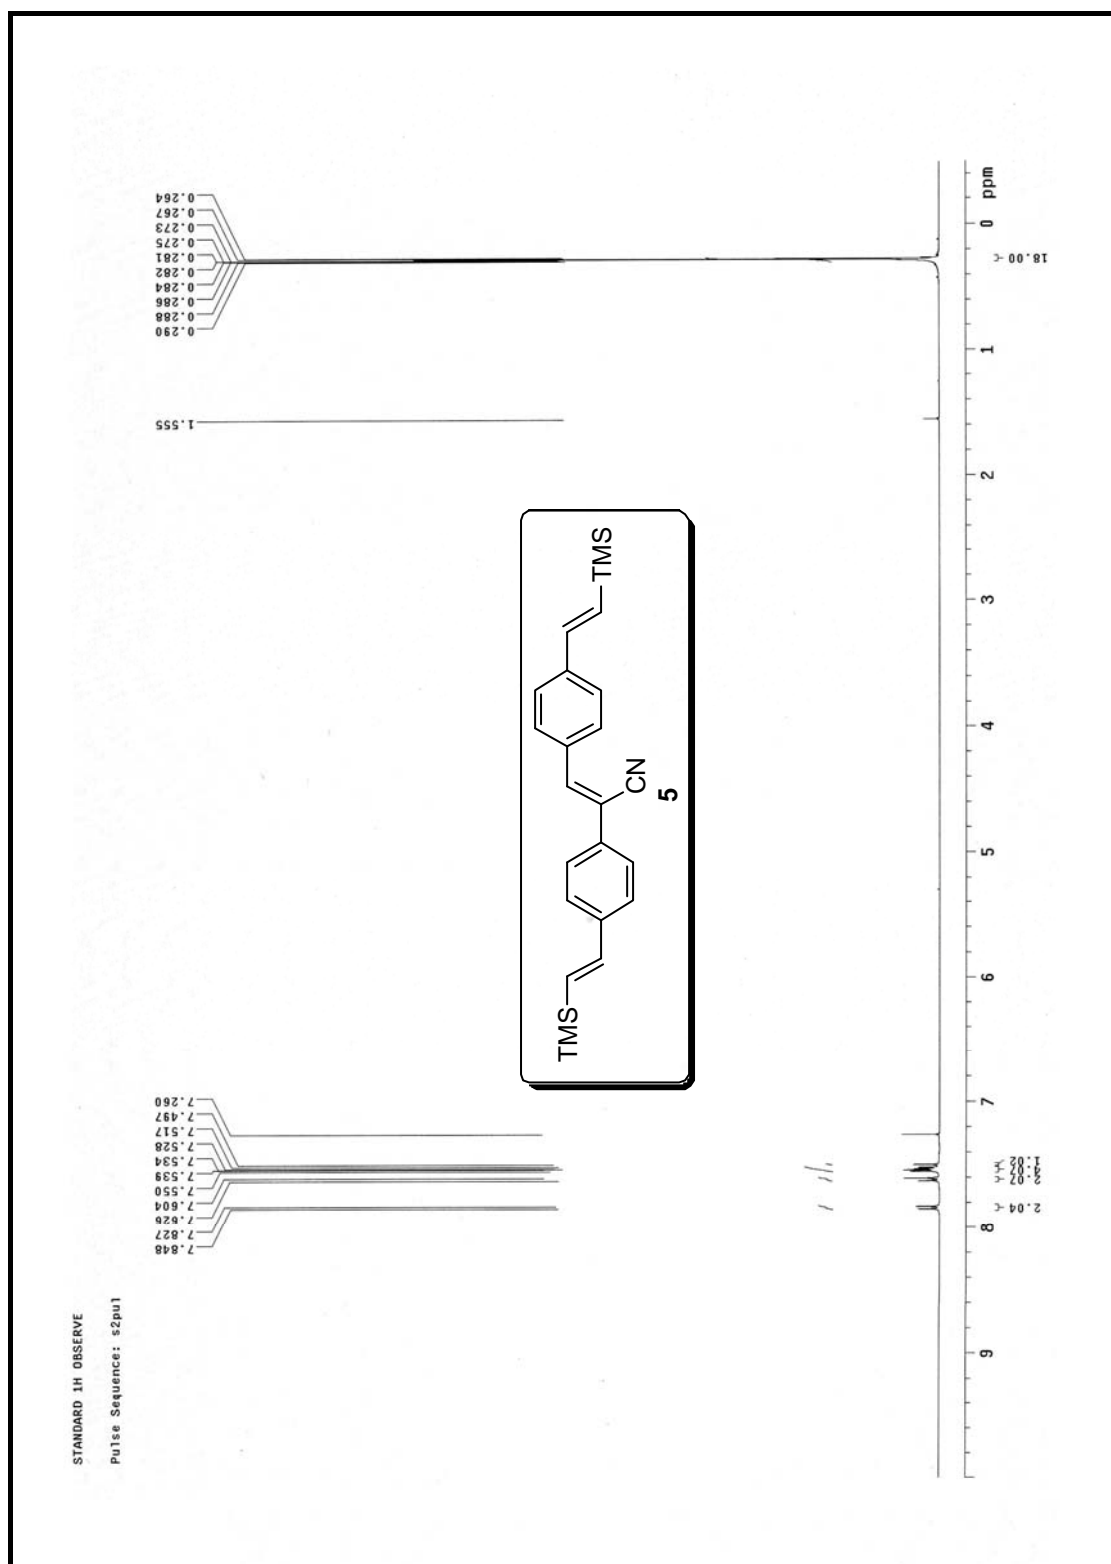

Fig. S7  $^1\text{H}$  NMR spectrum of **5**

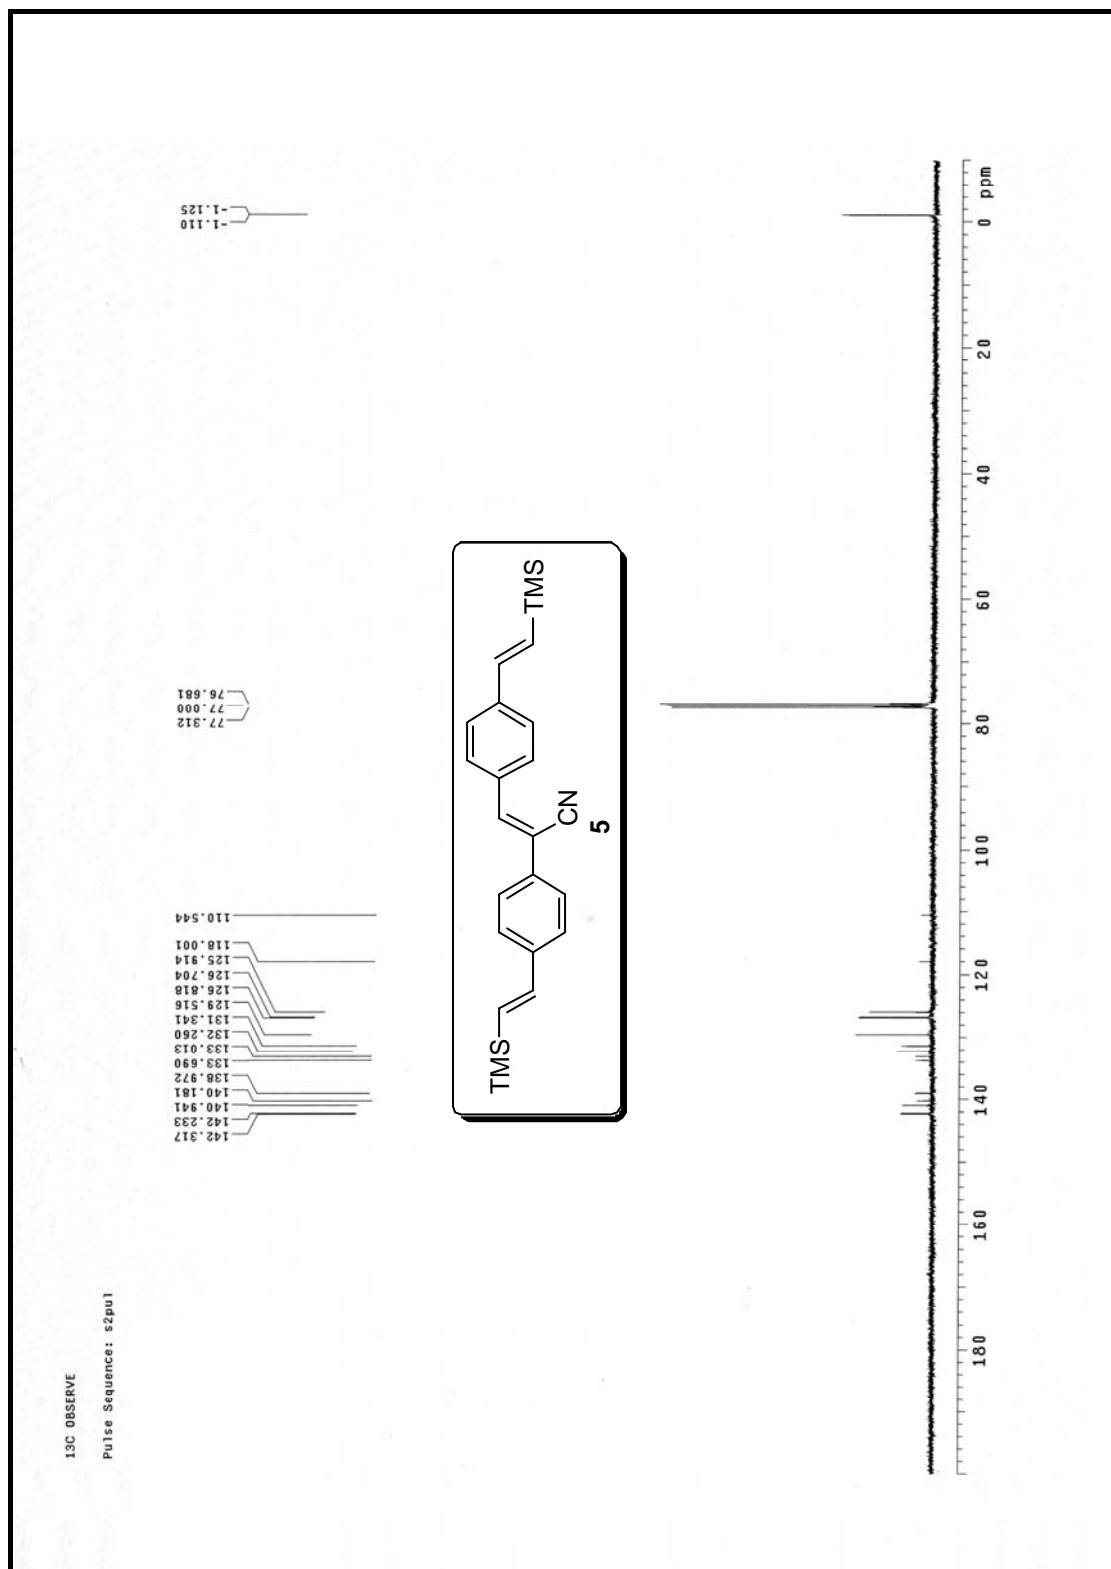

**Fig. S8**  $^{13}\text{C}$  NMR spectrum of **5**

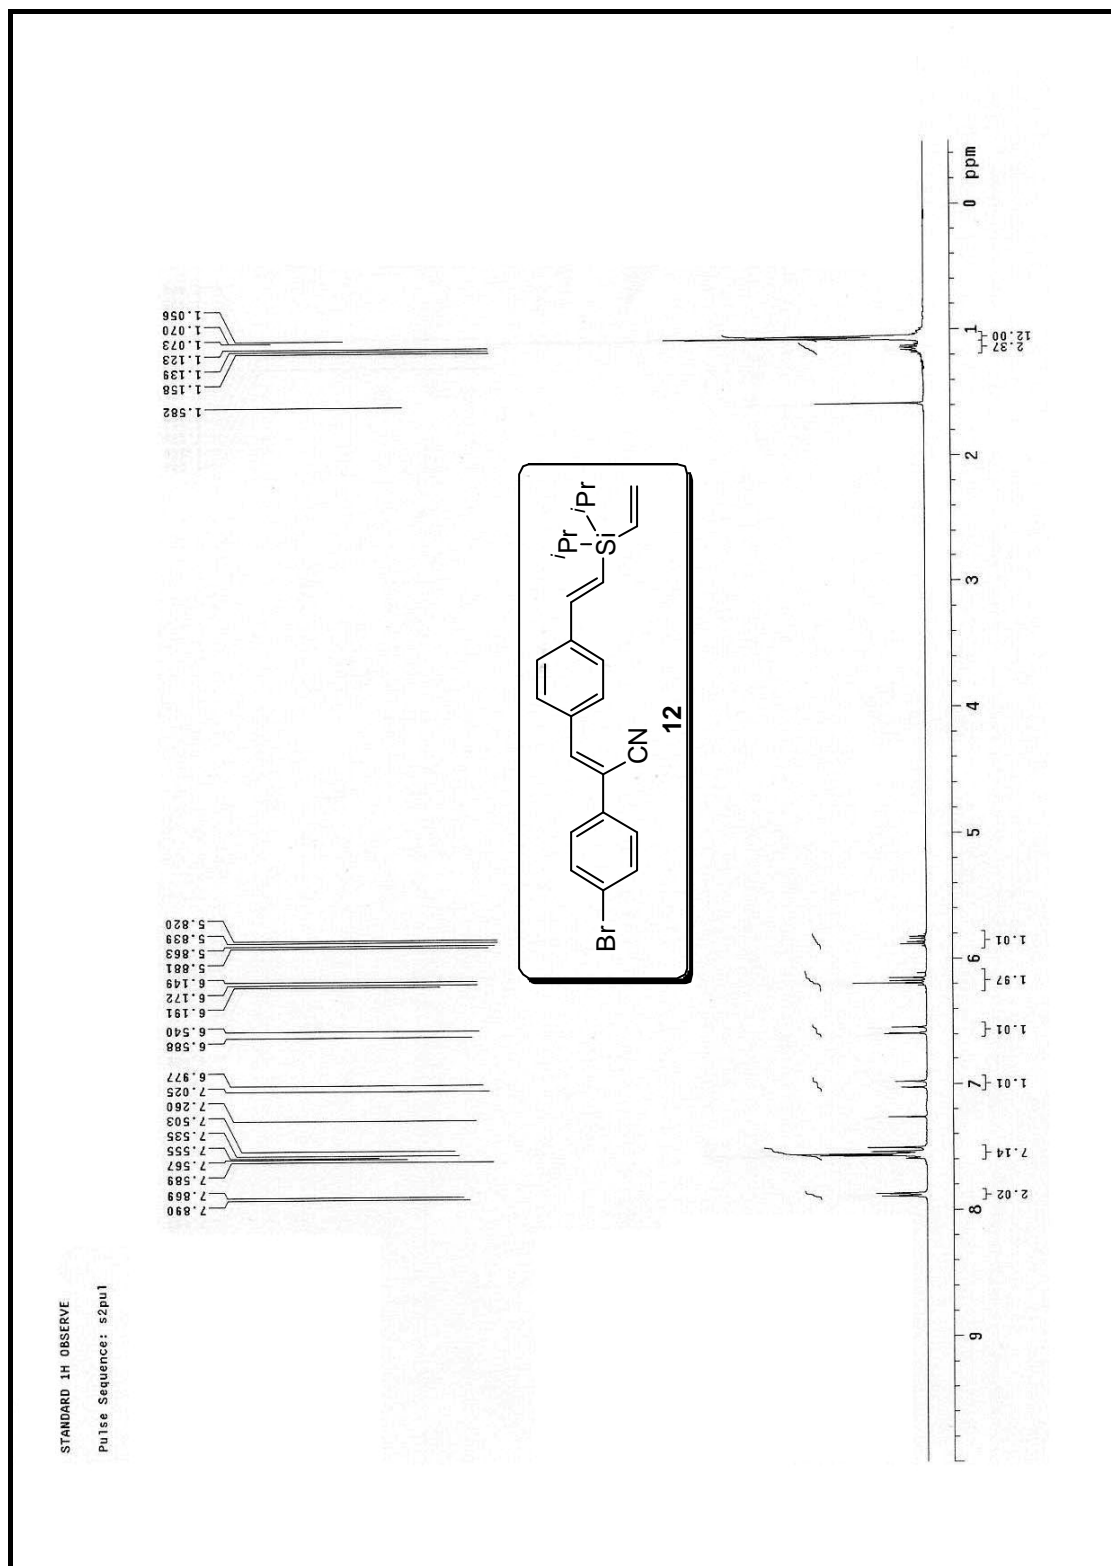

Fig. S9  $^1\text{H}$  NMR spectrum of **12**



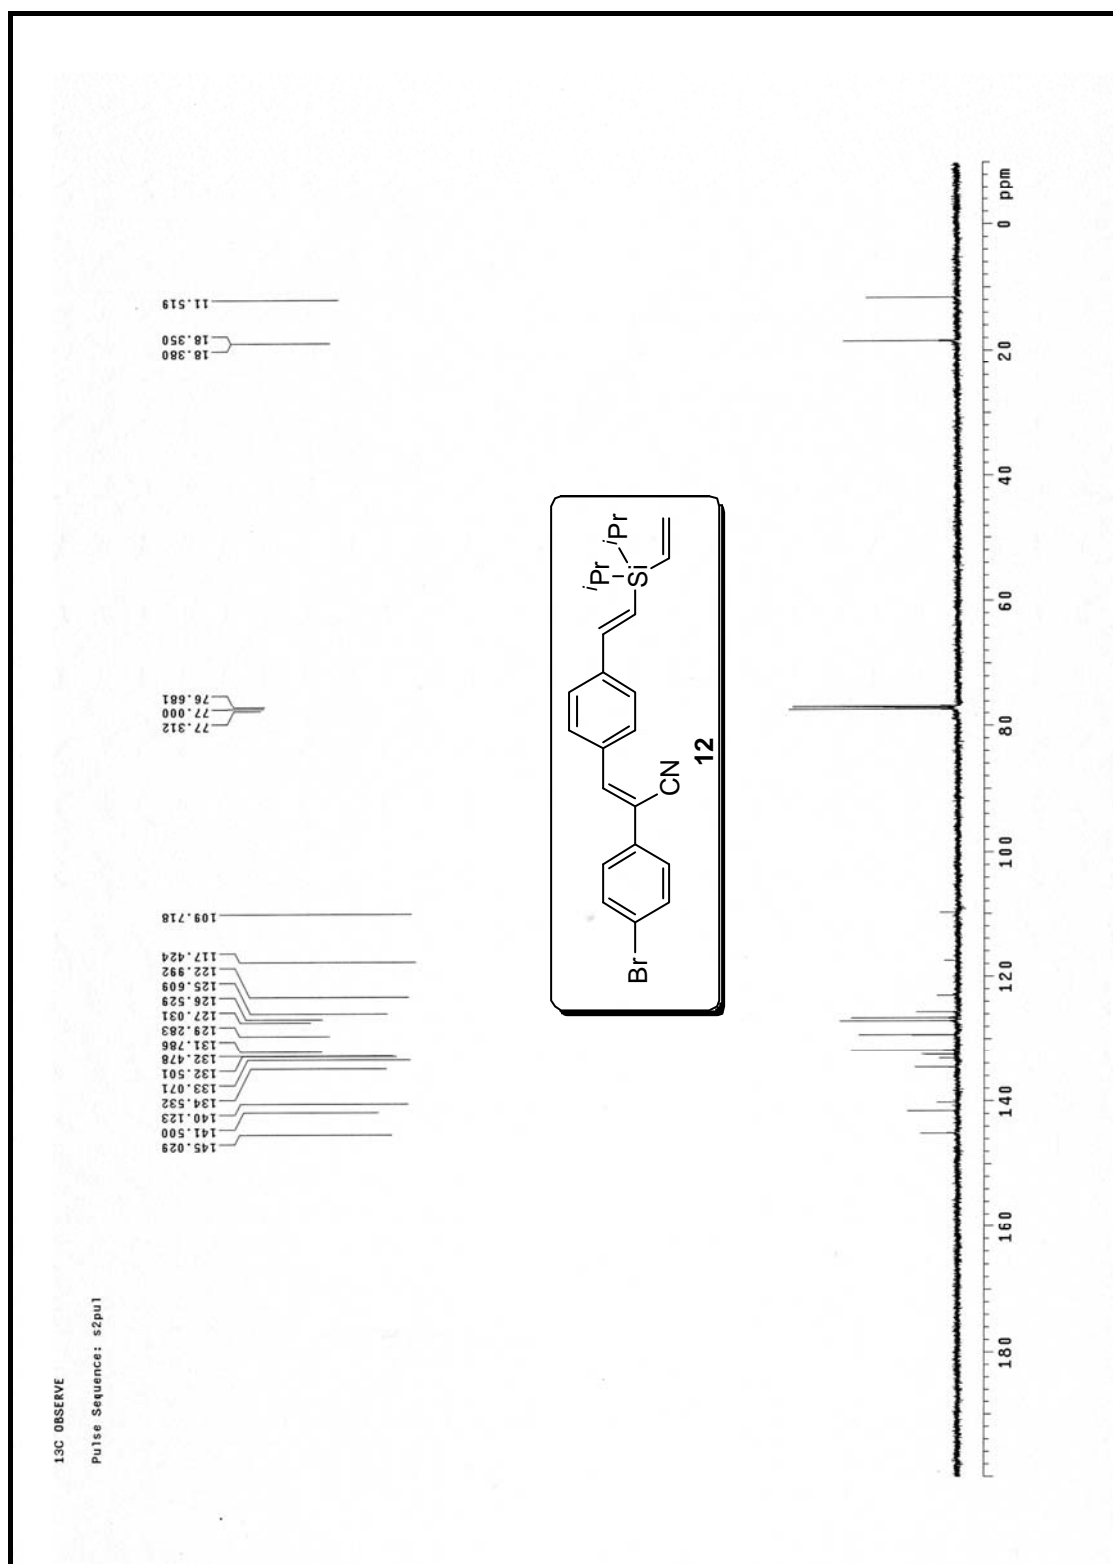

**Fig. S10**  $^{13}\text{C}$  NMR spectrum of **12**

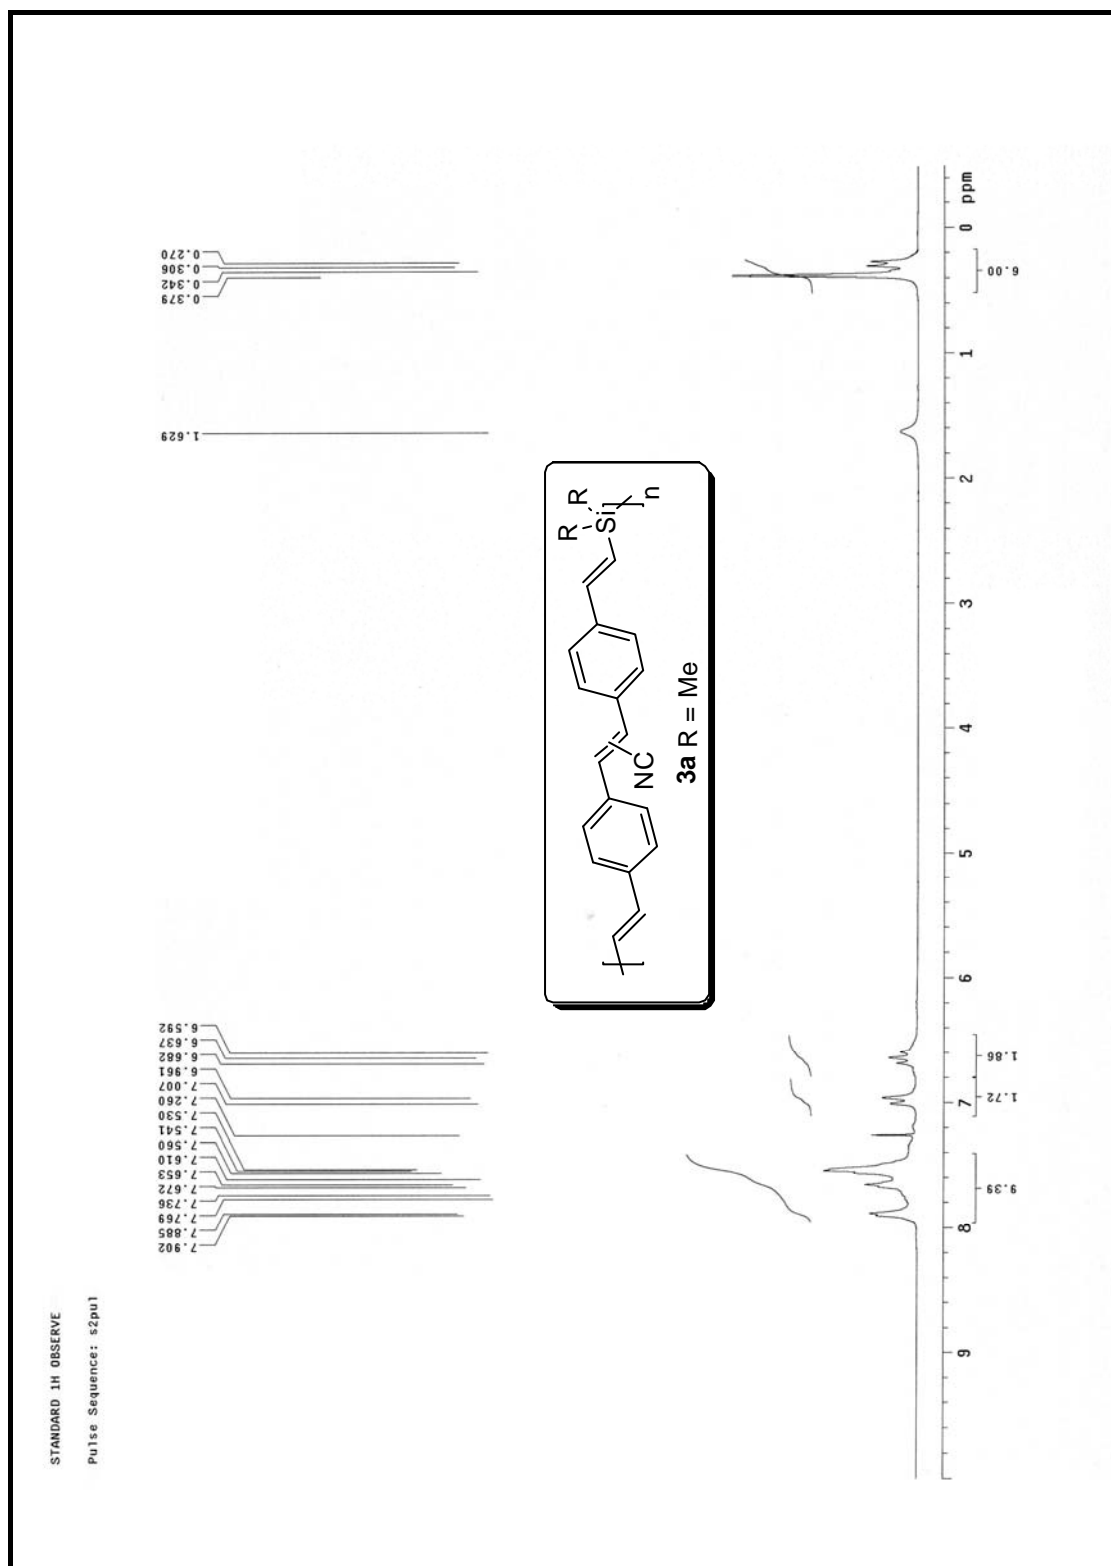

Fig. S11 <sup>1</sup>H NMR spectrum of 3a

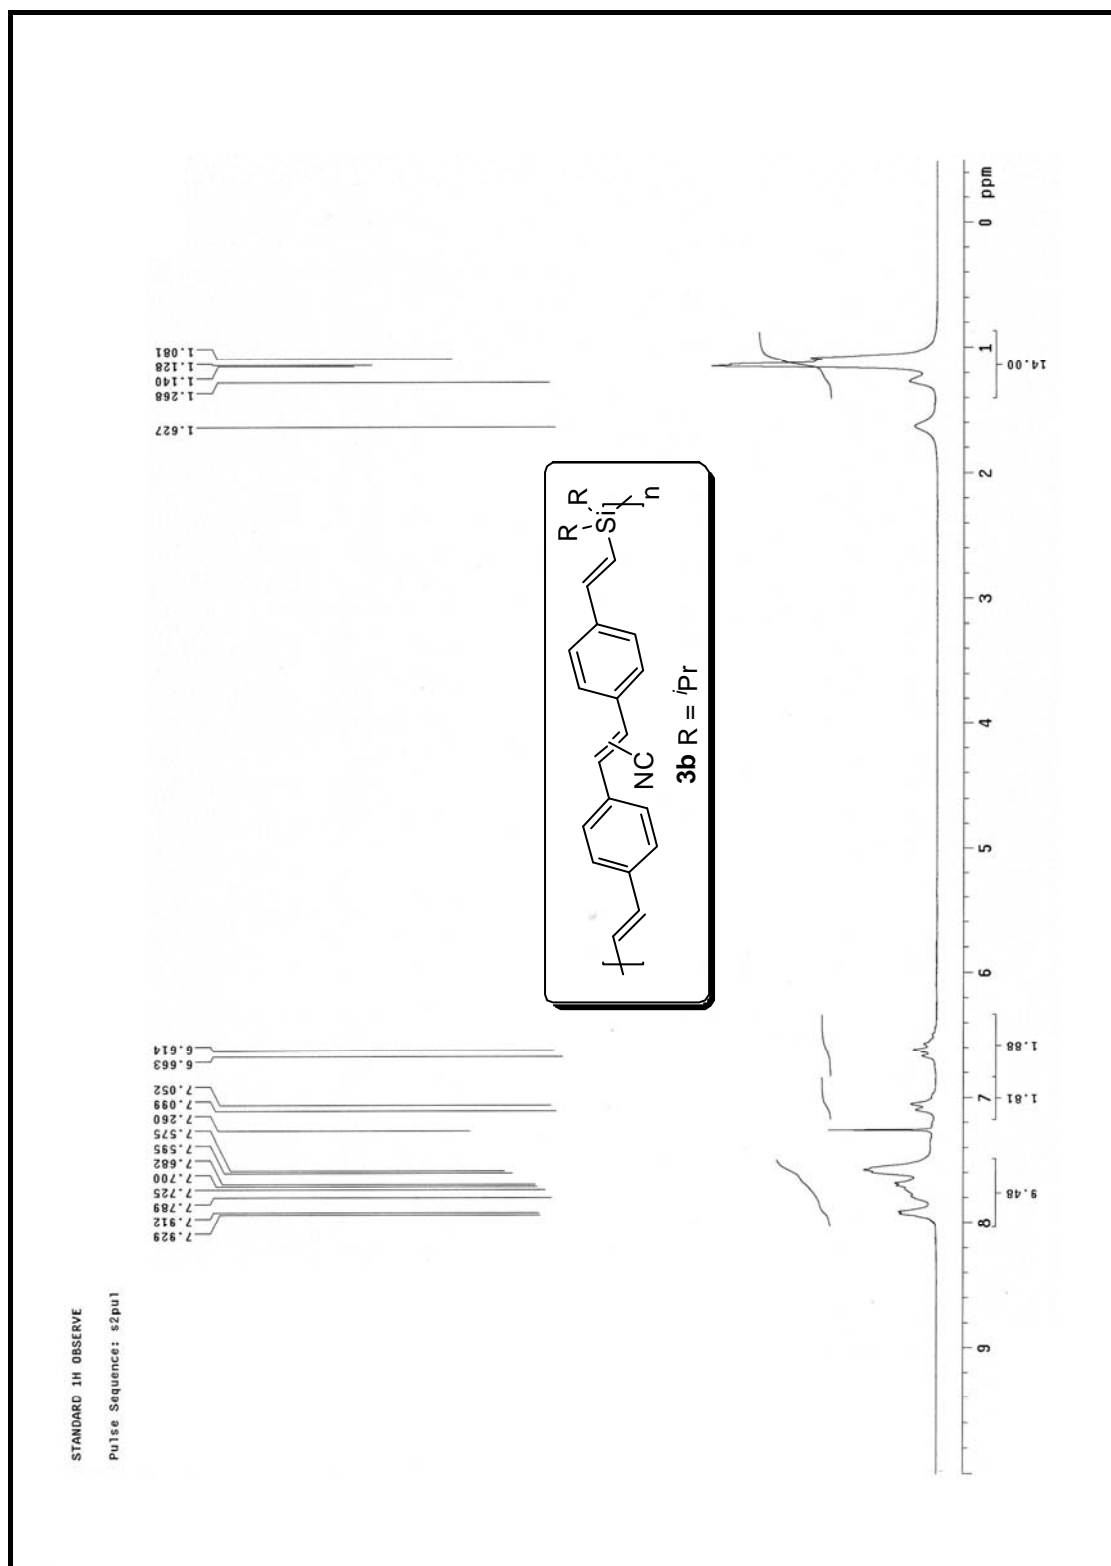

**Fig. S12**  $^1\text{H}$  NMR spectrum of **3b**

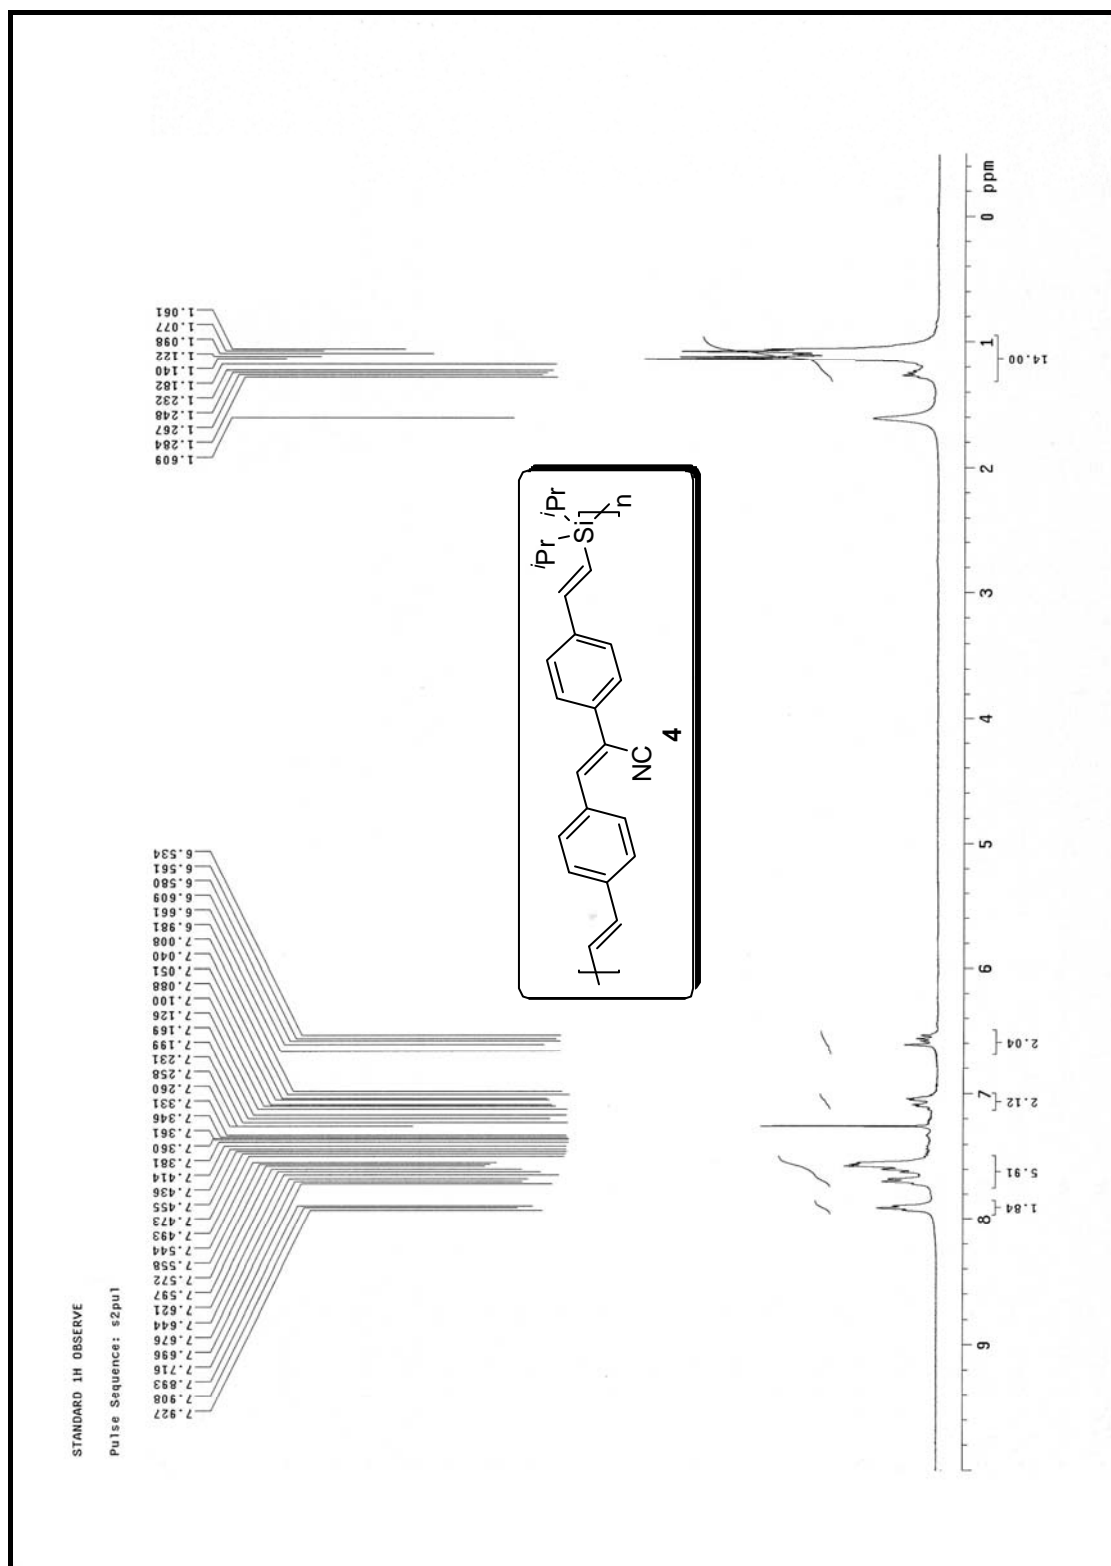

Fig. S13 <sup>1</sup>H NMR spectrum of 4
